# Supplementary material
Source: Research Square preprint supplement (doi:10.21203/rs.3.rs-8837598/v1)
Supplement: Supplementary file 1 [file d4d7cc694f8c30747c314072.pdf]

### **DATA AVAILABILITY STATEMENT**

The T-Drive and CabSpotting datasets utilized in this study originate from previously published studies and datasets, which are appropriately cited. The research results supporting the findings of this study are included within the article. The datasets used or analysed during the current study are available from the corresponding author on reasonable request.
